# Supplementary material
Source: ML conference proceedings conference paper supplement (https://proceedings.mlr.press/v37/bahadori15.html)
Supplement: Supplementary file 1 [file bahadori15-supp.pdf]

## A. Proof of the statement in Eq. (3)

In order to show the the result in Eq. (3), we break-down the process in Eq. (2) into two steps: Let us denote  $\tilde{X} = \sum_{\phi_k \in \Phi} \alpha_k \phi_k$  and  $X = d(\tilde{X})$  where  $\Phi$  is a set of  $s$  basis functions. Since the set of  $\tilde{X}$  functions create a linear subspace, every member can be written as a linear combination of at least  $s$  other functions:

$$\tilde{X}_i = \sum_{j \neq i} \beta_j \tilde{X}_j. \quad (7)$$

Given the fact that the set of deformations is a group, the inverse of deformation operators are also in the set and we can rewrite Eq. (7) as

$$d_i^{-1}(X_i) = \sum_{j \neq i} \beta_j d_j^{-1}(X_j), \quad (8)$$

$$X_i = d_i \left( \sum_{j \neq i} \beta_j d_j^{-1}(X_j) \right). \quad (9)$$

Since the operators are assumed to be linear maps, we can rewrite Eq. (9) as follows

$$X_i = \sum_{j \neq i} \beta_j d_i(d_j^{-1}(X_j)). \quad (10)$$

Group's closure property guarantees that for all  $i$  and  $j$ , there exists  $\tilde{d}_j$  in the group such that  $\tilde{d}_j = d_i \circ d_j^{-1}$ . Thus we can rewrite Eq. (10) as

$$X_i = \sum_{j \neq i} \beta_j \tilde{d}_j(X_j).$$

## B. Proof of the Theorem

To prove the statement of the theorem, we need to show that by selection of the termination criterion as the theorem suggests, the Algorithm 1 will stop before adding any functions from other subspaces. In other words, Let us study the correctness of the theorem for neighbors of an arbitrary function  $Y_i$ ; heretofore we drop the  $i$  index for simplicity of notation whenever it is not ambiguous. If  $R_k$  denotes the residual at  $k$ th step, define the normalized residual as  $\bar{R}_k = R_k / \|R\|_2$ ; we need to show that the following quality cannot be larger than  $\epsilon$ :

$$\max_{V \notin \mathcal{Y}_i, d} \langle \bar{R}_k, \bar{d}(V) \rangle < \epsilon.$$

where  $\bar{d}(Y) = d(Y) / \|d(Y)\|_2$  for any function  $Y$ . Furthermore, define

$$\mu_\ell = \max_{\ell' \neq \ell} \sup_{V \in S_\ell, Z \in S_{\ell'}, d, d'} \frac{|\langle d(V), d'(U) \rangle|}{\|d(V)\|_2 \|d'(U)\|_2}.$$

---

### Algorithm 2: Spectral clustering for FSC.

---

**Data:** Affinity matrix  $\mathbf{A}$

**Result:** Clustering assignments for  $Y_i, i = 1, \dots, n$ .

- 1  $\mathbf{D} \leftarrow \text{diag}(\mathbf{A}\mathbf{1})$
  - 2  $\mathbf{L} \leftarrow \mathbf{D}^{-\frac{1}{2}} \mathbf{A} \mathbf{D}^{-\frac{1}{2}}$
  - 3  $\boldsymbol{\lambda}, \mathbf{V} \leftarrow \text{eig}(\mathbf{L})$
  - 4  $m^* \leftarrow \text{argmax}_{i=1, \dots, n-1} (\lambda_i - \lambda_{i+1})$
  - 5 Apply  $k$ -means to the first  $m^*$  column of  $\mathbf{V}$ .
- 

We note that we always have  $\mu_\ell \leq \theta_\ell$ , as  $\mathcal{Y}_\ell \subset S_\ell$ . Also, let us define the span of  $d(\mathcal{Y}_\ell)$  as the span of the set of functions  $\{d(Y) | Y \in \mathcal{Y}_\ell\}$ .

To prove the main statement, we proceed with induction, as in (Dyer et al., 2013). Given the assumptions and the quantity of  $\epsilon$  in the theorem, the first step holds, because  $R_k = Y_i$ . Now, assume that at  $k$ th iteration all of the previous functions have been selected from the correct subspace. Given the result in Eq. (3), the residual is still in the span of the  $d(\mathcal{Y}_\ell)$ . Thus, we can write  $\bar{R}_k = \bar{d}_1(U) + E$  where  $U$  is the closes function in  $\mathcal{Y}_\ell$  to  $\bar{R}_k$  and  $E \in S_i$ , the latter is due to the assumption that  $d$  is a linear map. We can write:

$$\begin{aligned} & \max_{Y_j \notin \mathcal{Y}_1, d_1, d_2} |\langle \bar{R}_k, \bar{d}_2(Y_j) \rangle| \\ &= \max_{Y_j \notin \mathcal{Y}_1, d_1, d_2} |\langle \bar{d}_1(U) + E, \bar{d}_2(Y_j) \rangle| \\ &\leq \max_{Y_j \notin \mathcal{Y}_1, d_1, d_2} |\langle \bar{d}_1(U), \bar{d}_2(Y_j) \rangle| + |\langle E, \bar{d}_2(Y_j) \rangle| \\ &\leq \mu_\ell + \max_{Y_j \notin \mathcal{Y}_1, d_1, d_2} |\langle E, \bar{d}_2(Y_j) \rangle| \\ &\leq \mu_\ell + \cos \theta_0 \|E\|_2 \|\bar{d}_2(Y_j)\|_2, \end{aligned} \quad (11)$$

where  $\theta$  is the minimum principal angle between  $S_i$  and all other subspaces. We can bound the  $\|E\|_2$  as follows:

$$\begin{aligned} \|E\|_2 &= \|\bar{R}_k - \bar{d}_1(U)\|_2 \\ &= \sqrt{\|\bar{R}_k\|_2^2 + \|\bar{d}_1(U)\|_2^2 - 2\langle \bar{R}_k, \bar{d}_1(U) \rangle} \\ &\leq \sqrt{2 - 2\sqrt{1 - (r_\ell/2)^2}}. \end{aligned} \quad (12)$$

Plugging the result in Eq. (12) in Eq. (11) yields:

$$\begin{aligned} \max_{Y_j \notin \mathcal{Y}_1, d_1, d_2} |\langle \bar{R}_k, \bar{d}_2(Y_j) \rangle| &\leq \mu_\ell + \cos \theta_0 \sqrt{2 - \sqrt{4 - r_\ell^2}} \\ &\leq \mu_\ell + \cos \theta_0 \frac{r_\ell}{\sqrt[4]{12}}, \end{aligned}$$

where the last step is due to (Dyer et al., 2013, Lemma 1). Given the fact that  $\cos \theta$  is an upper bound for  $\mu_\ell$ , we can obtain the statement in the theorem.

## C. Spectral Clustering

Note that we use the eigen-gap statistic (Line 4 in Algorithm 2 to determine the dimension of the embedding (Tib-

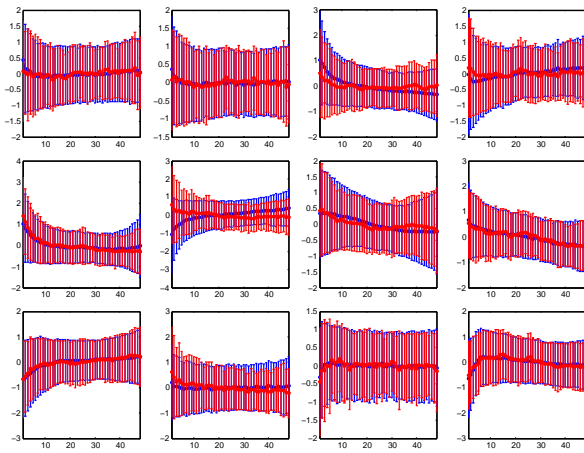

Figure 4. Mean and standard deviation trajectories for twelve variables in Physionet dataset, for patients who *survived* (blue) and *deceased* (red). Note the similarity of time series and the fact that they are almost indistinguishable by naked eye.

shirani et al., 2001; Von Luxburg, 2007).
